# Supplementary material for: A ruthenium-inserted hydrotalcite (Ru-HT) heterogeneous catalyst: kinetic studies on the selective hydrogenation of carbon dioxide to formic acid
Source: Royal Society of Chemistry journal article supplement (doi:10.1039/d1ma00431j), 2021-01-01
Supplement: d1ma00431j1.pdf [file d1ma00431j1.pdf]

## Electronic Supplementary Information (ESI)

### **Ruthenium Inserted Hydrotalcite (Ru-HT) Heterogeneous Catalyst for the Kinetic Studies of Selective Hydrogenation of Carbon Dioxide to Formic Acid**

Minaxi S. Maru<sup>a,c,d\*</sup>, Sanwala Ram<sup>a,b</sup>, Noor-ul H. Khan<sup>a,b</sup>, Ram S. Shukla<sup>a,b\*</sup>

<sup>a</sup>Inorganic Materials and Catalysis Division, Council of Scientific and Industrial Research (CSIR), Central Salt and Marine Chemicals Research Institute, G. B. Marg, Bhavnagar, 364002, Gujarat, India

<sup>b</sup>Academy of Scientific and Innovative Research (AcSIR), Council of Scientific and Industrial Research (CSIR), Central Salt and Marine Chemicals Research Institute, G. B. Marg, Bhavnagar, 364002, Gujarat, India

<sup>c</sup>Inorganic Chemistry Division, Department of Chemistry, Saurashtra University, Rajkot, 360005, Gujarat, India

<sup>d</sup>Department of Chemistry, Indian Institute of Teachers Education (IITE), Gandhinagar, 382016, Gujarat, India

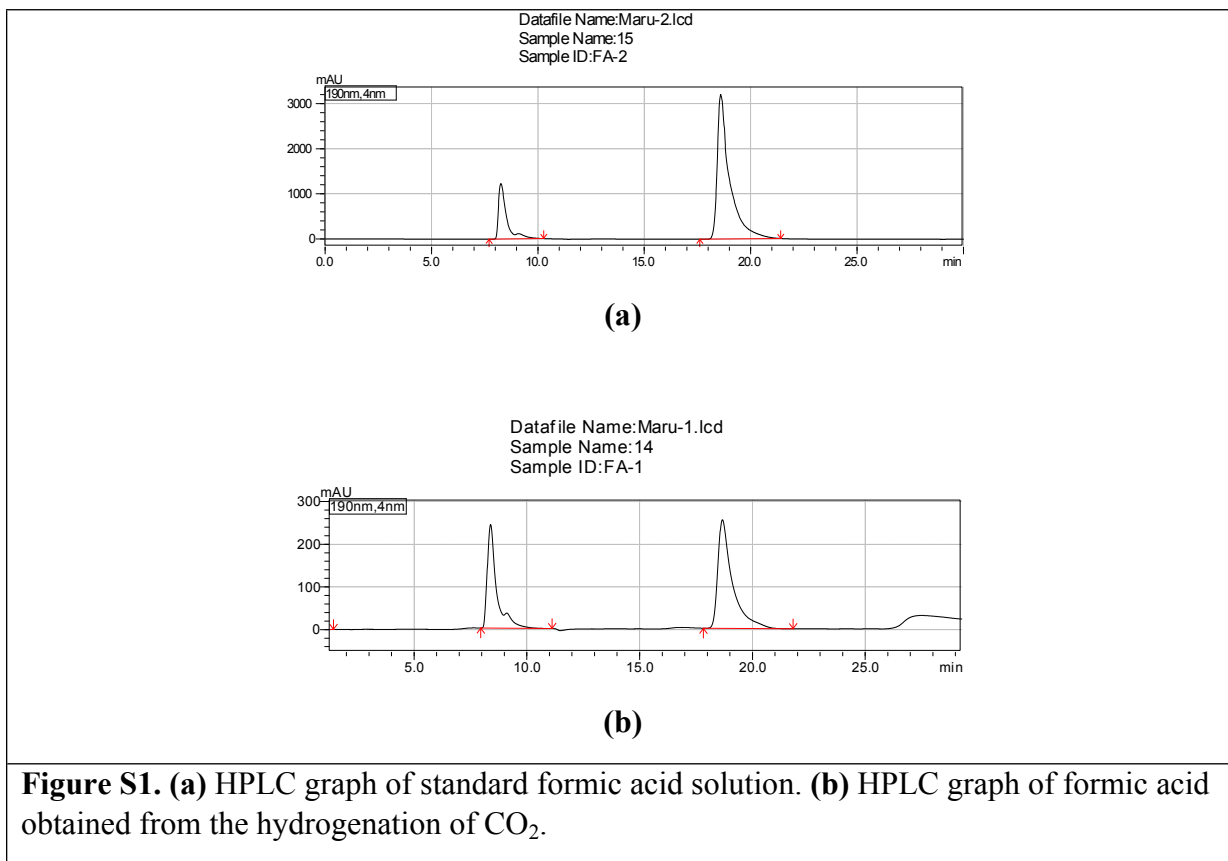

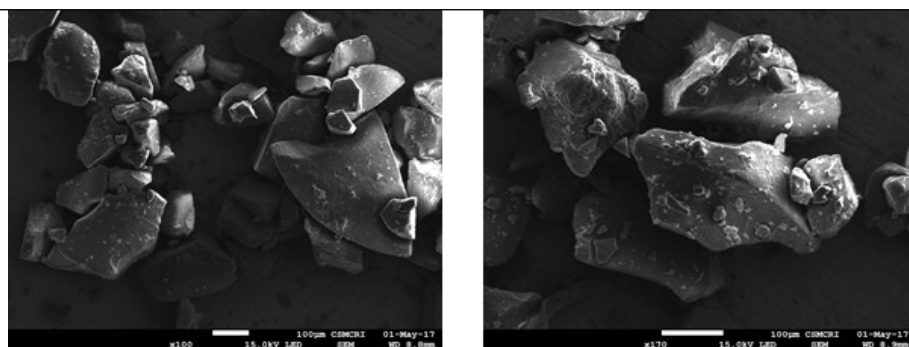

(a)

(b)

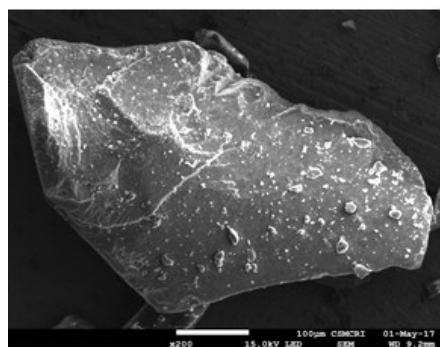

(c)

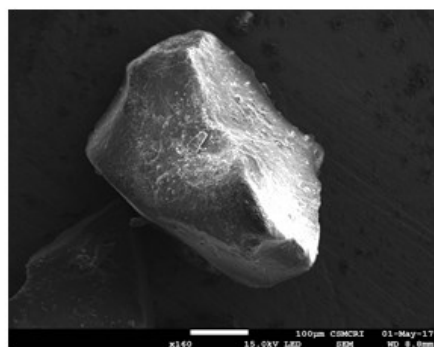

(d)

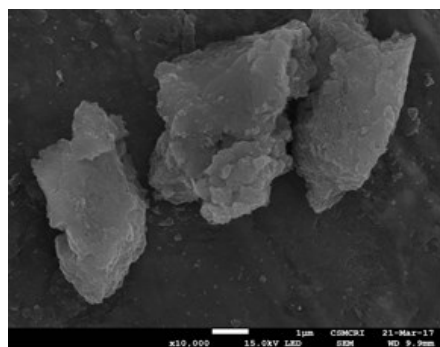

(e)

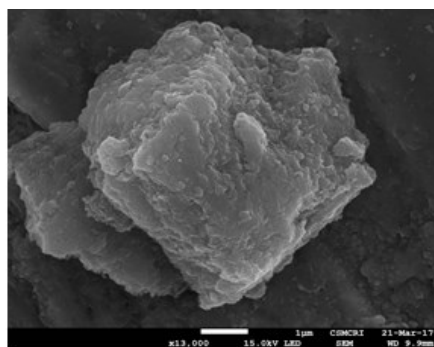

(f)

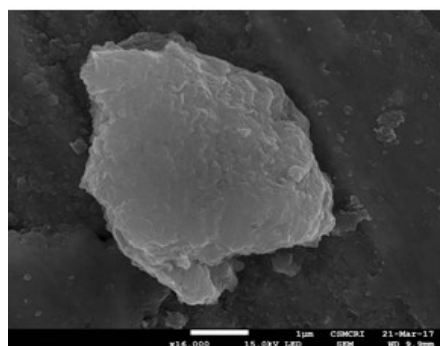

(g)

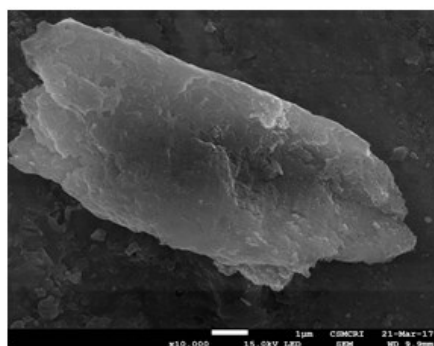

(h)

**Figure S2.** Field Emission Scanning Electron Microscope (FE-SEM) images of Ru-HT (a-d) and R Ru-HT (e-h).

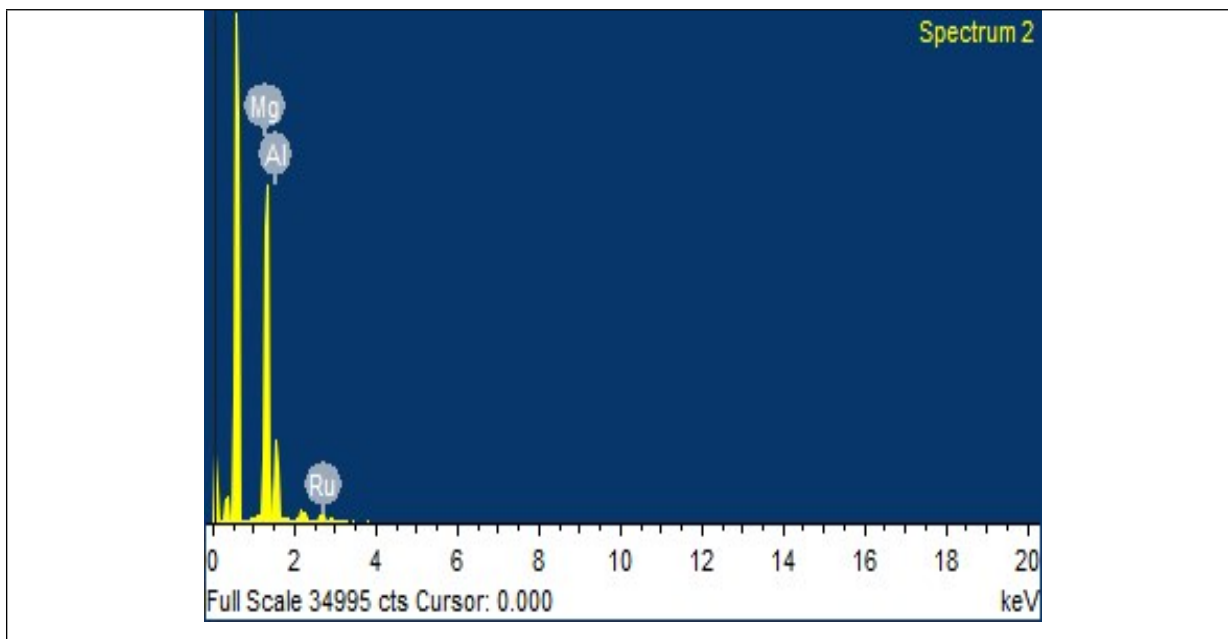

**Figure S3.** Scanning Electron Microscope-EDX graph of Ru-HT showing the presence of Ru<sup>II</sup> ion.

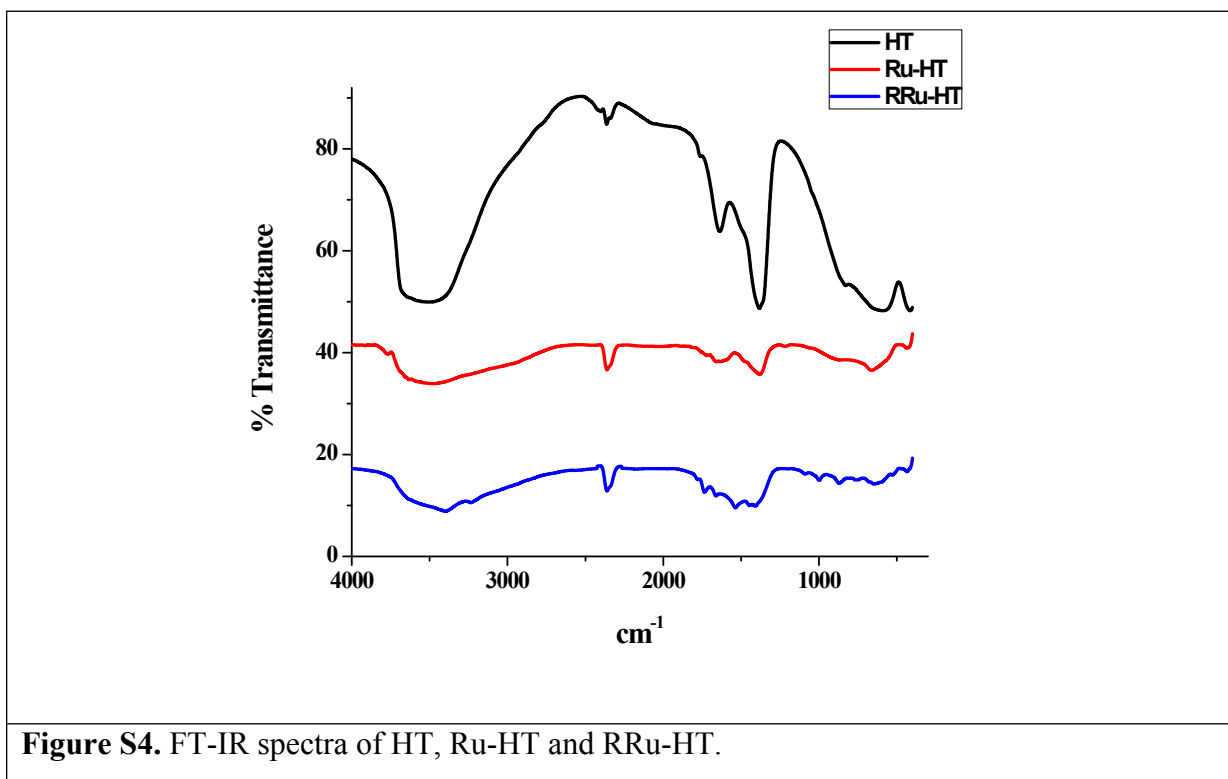

**Figure S4.** FT-IR spectra of HT, Ru-HT and RRu-HT.

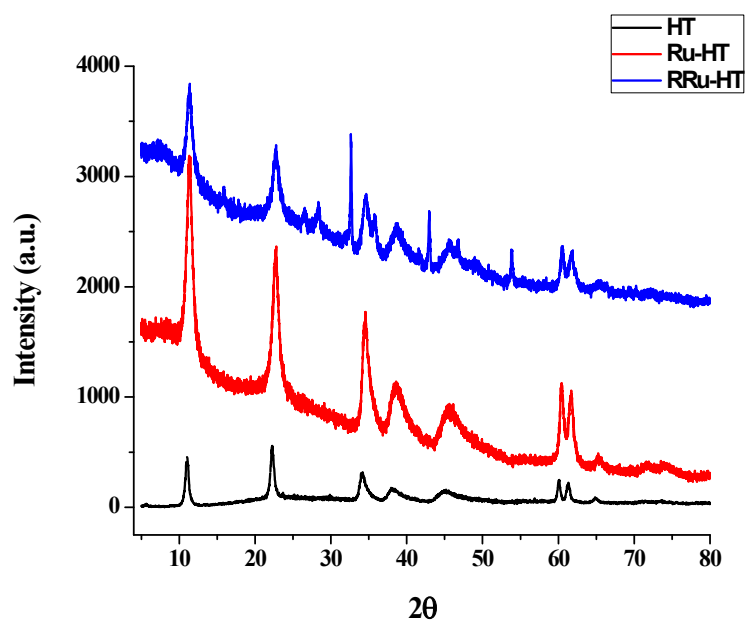

**Figure S5.** XRD spectra of HT, Ru-HT and RRu-HT (Recycled Ru-HT).

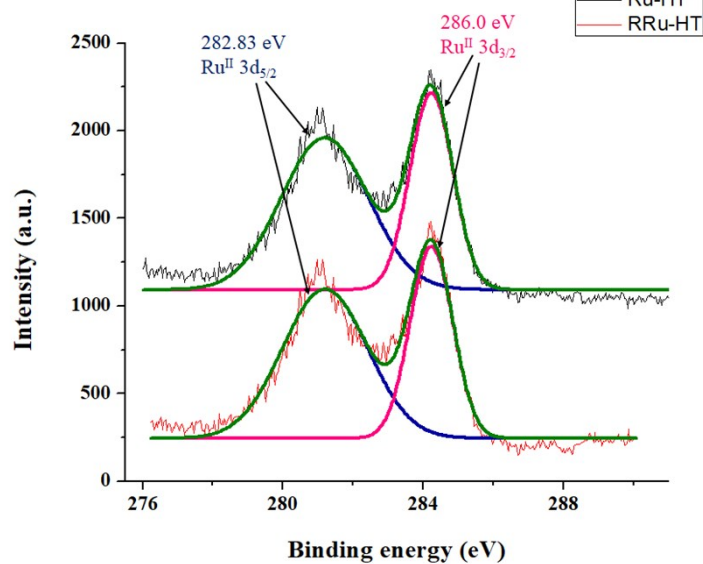

**Figure S6.** The X-ray photoelectron spectroscopy (XPS) of Ru<sup>II</sup> 3d species observed in Ru-HT and RRu-HT.
